# Supplementary material for: Facile synthesis of chain end functionalized polyethylenes via epoxide ring-opening and thiol–ene addition click chemistry
Source: Royal Society of Chemistry journal article supplement (doi:10.1039/c3py00727h), 2013-07-19
Supplement: c3py00727h.pdf [file c3py00727h.pdf]

*Electronic Supplementary Information for:*

**Facile synthesis of chain end functionalized polyethylenes via epoxide ring-opening and thiol-ene addition click chemistry**

Yongjie Zhang<sup>a,b</sup>, Huayi Li<sup>\*a</sup>, Jin-Yong Dong<sup>\*a</sup>, Youliang Hu<sup>a</sup>

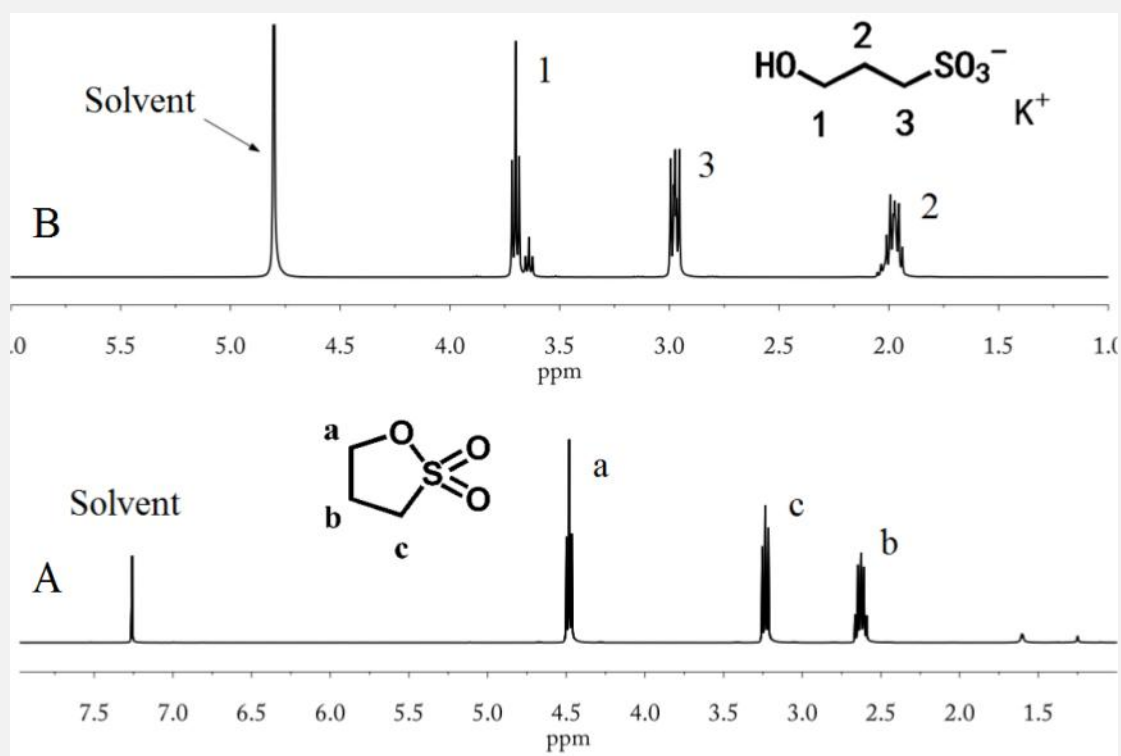

**Figure S1** <sup>1</sup>H NMR of 1,3-PS (A, CDCl<sub>3</sub>) and KPS (B, D<sub>2</sub>O)



assignments similar to carboxy-t-PE)

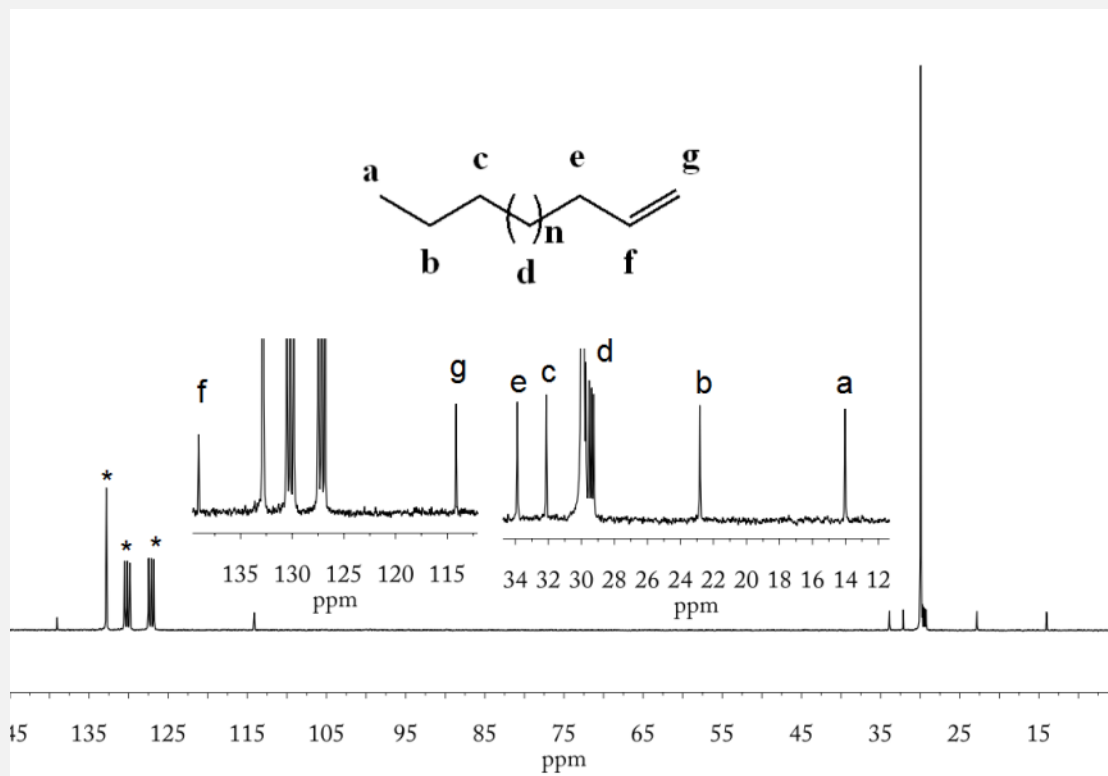

Figure S4  $^{13}\text{C}$  NMR spectrum of v-PE1 (1,2-Dichlorobenzene-d<sub>4</sub>)

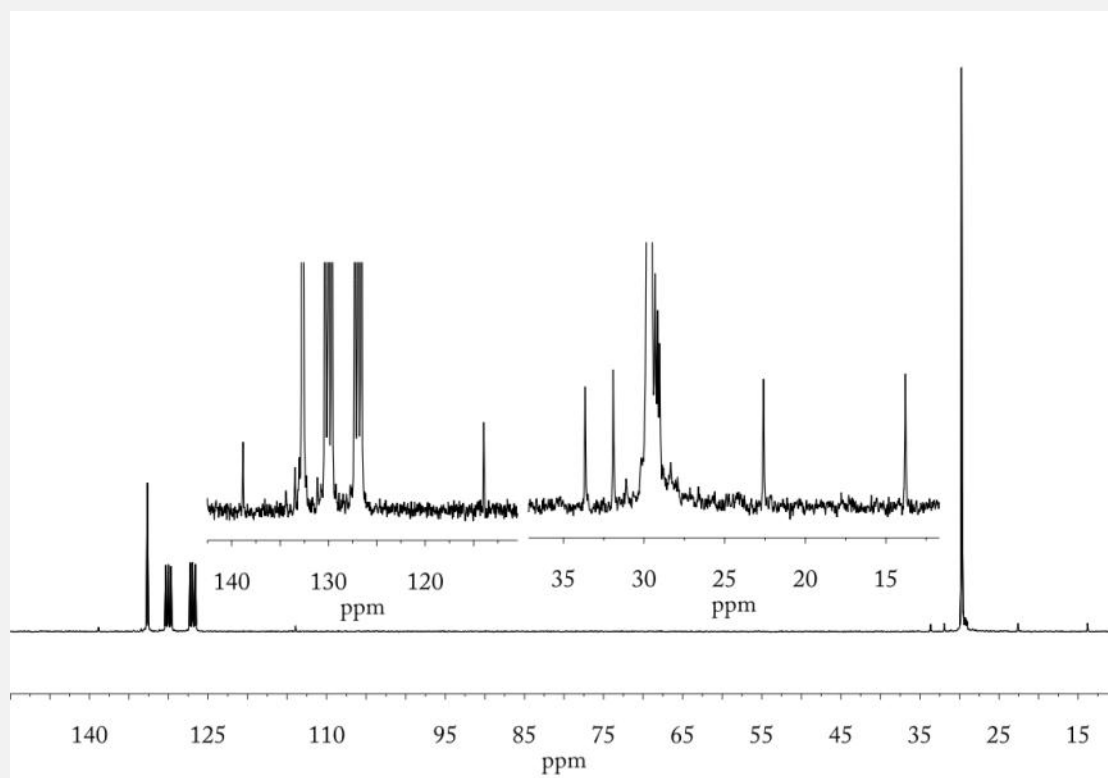

**Figure S5**  $^{13}\text{C}$  NMR spectrum of v-PE2 (1,2-Dichlorobenzene-d<sub>4</sub>, assignments similar to v-PE1)

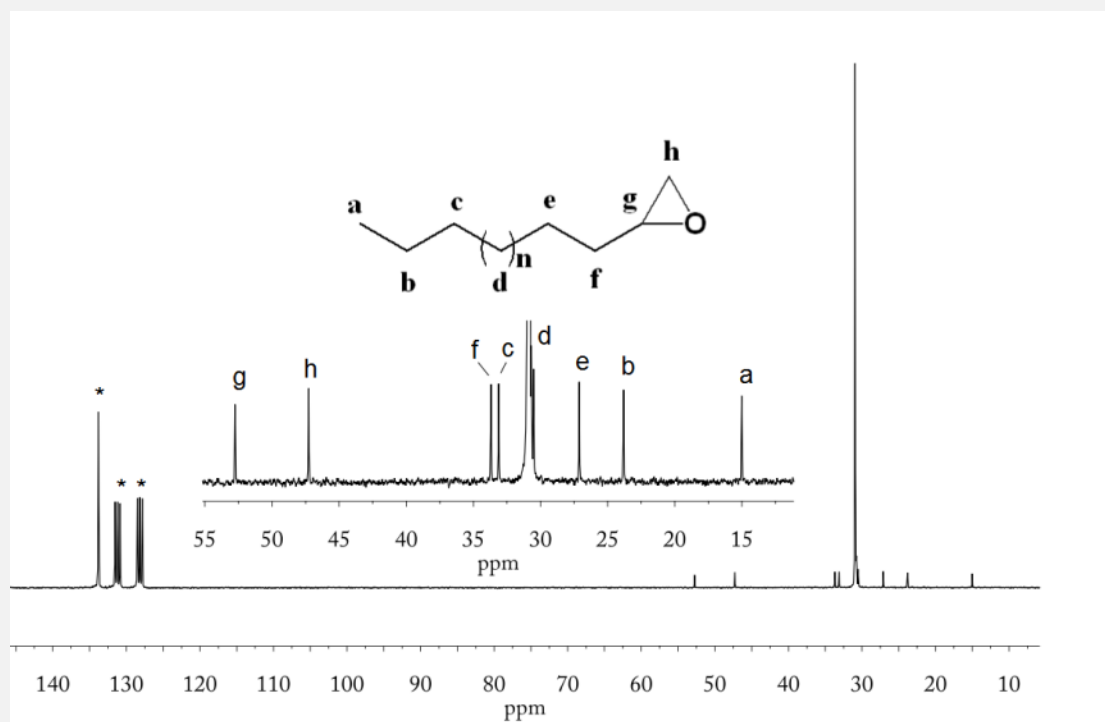

**Figure S6**  $^{13}\text{C}$  NMR spectrum of e-PE (1,2-Dichlorobenzene-d<sub>4</sub>)

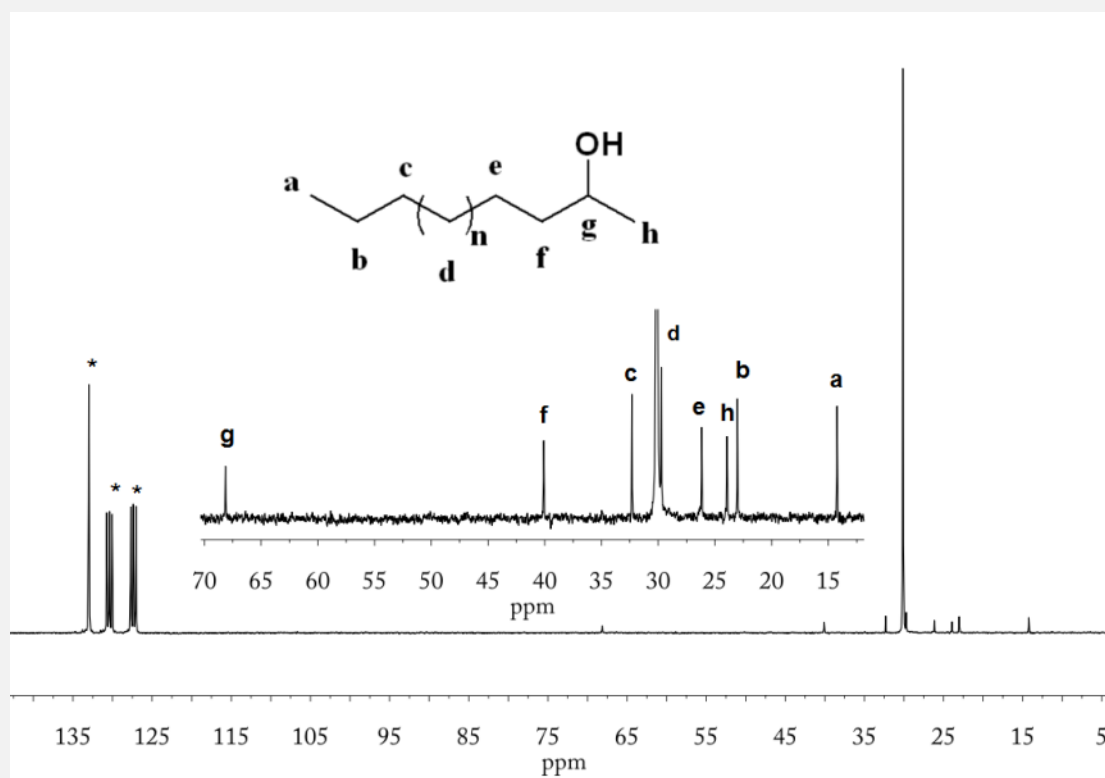

Figure S7  $^{13}\text{C}$  NMR spectrum of 2-hydroxy PE (1,2-Dichlorobenzene- $\text{d}_4$ )

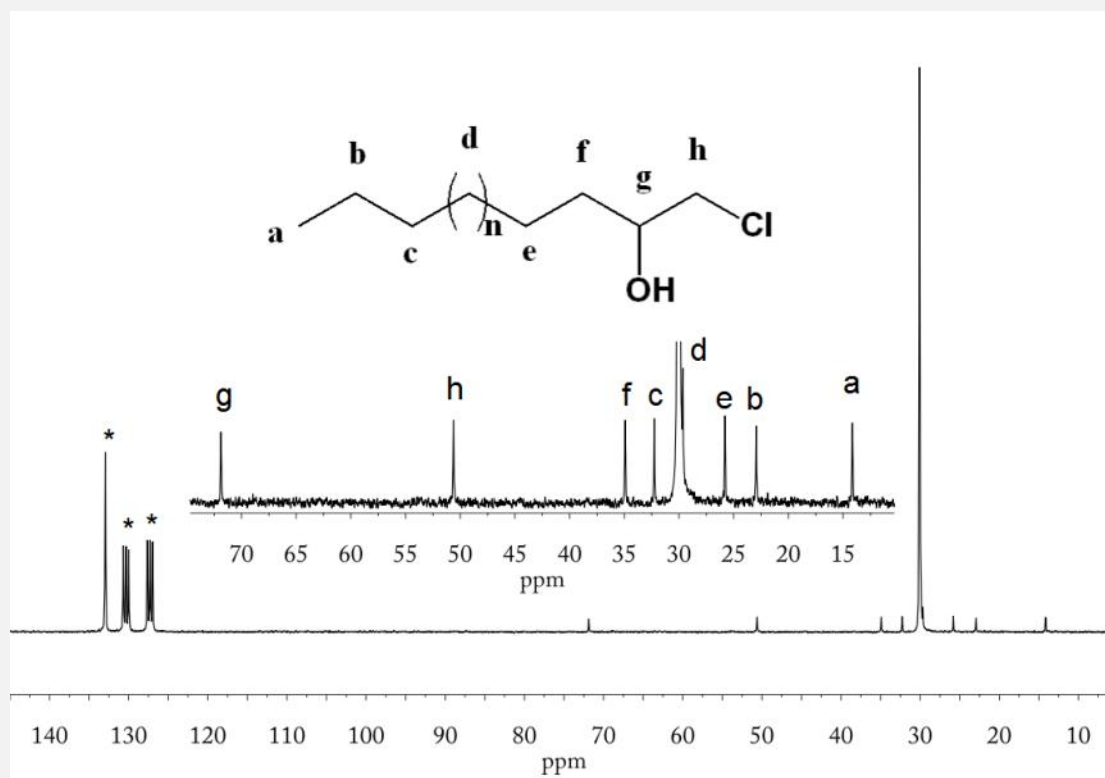

Figure S8  $^{13}\text{C}$  NMR spectrum of chloro-t-PE (1,2-Dichlorobenzene- $\text{d}_4$ )

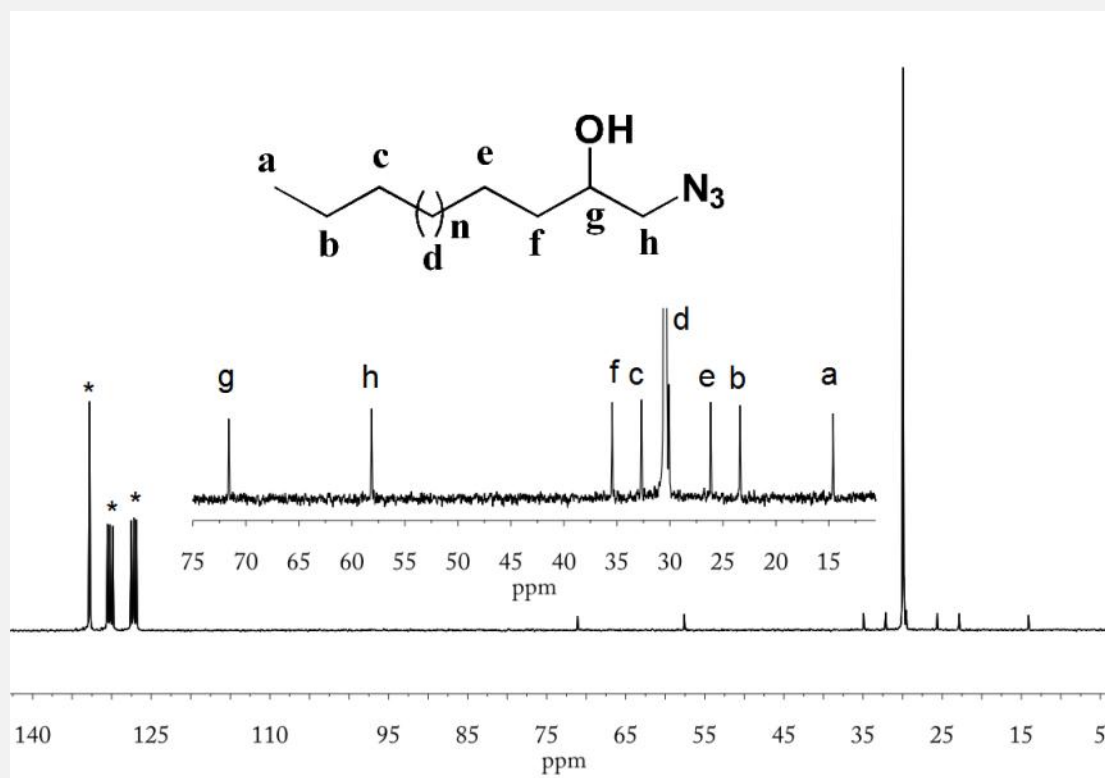

Figure S9  $^{13}\text{C}$  NMR spectrum of azide-t-PE (1,2-Dichlorobenzene- $\text{d}_4$ )

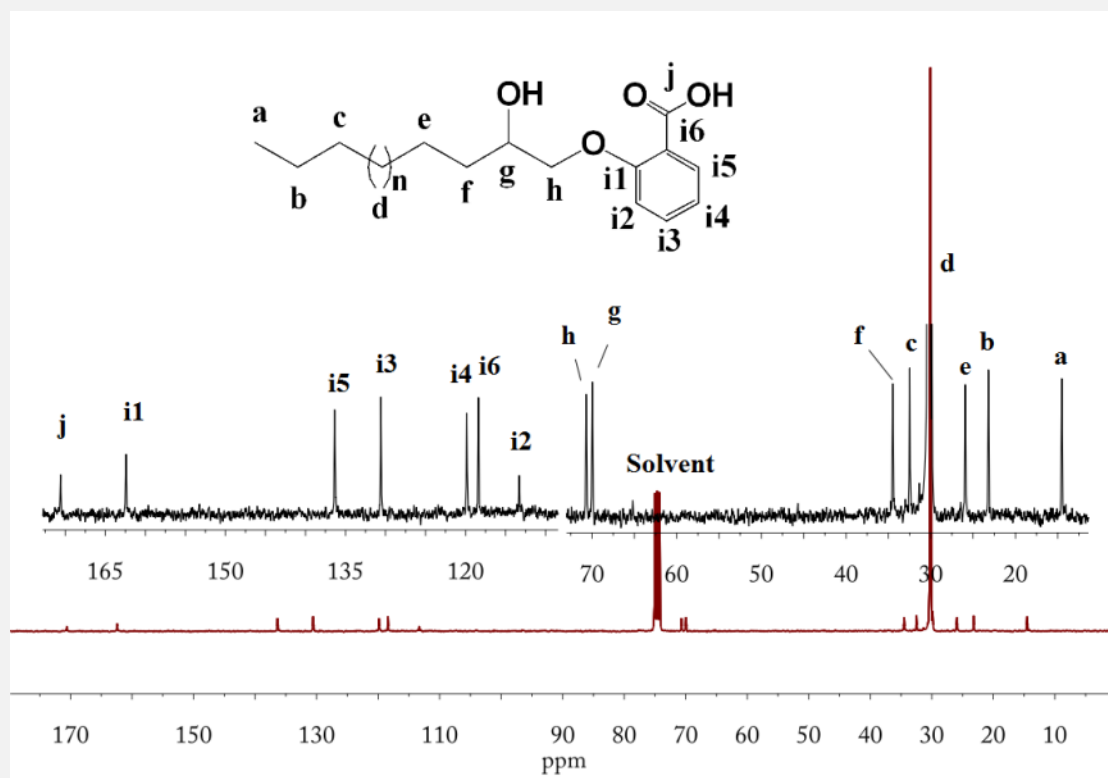

Figure S10  $^{13}\text{C}$  NMR spectrum of carboxy-t-PE (1,1,2,2-Tetrachloroethane- $\text{D}_2$ )

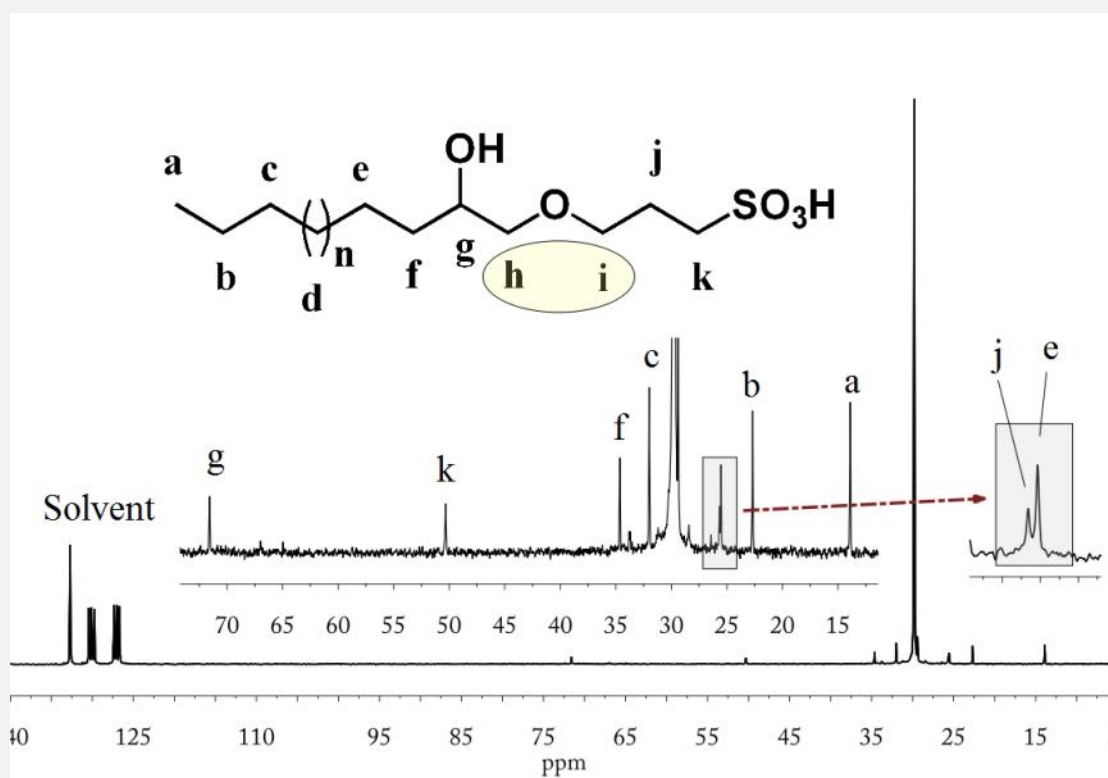

Figure S11  $^{13}\text{C}$  NMR spectrum of sulfo-t-PE (1,2-Dichlorobenzene- $\text{d}_4$ , carbons

labelled with *h* and *i* not found)

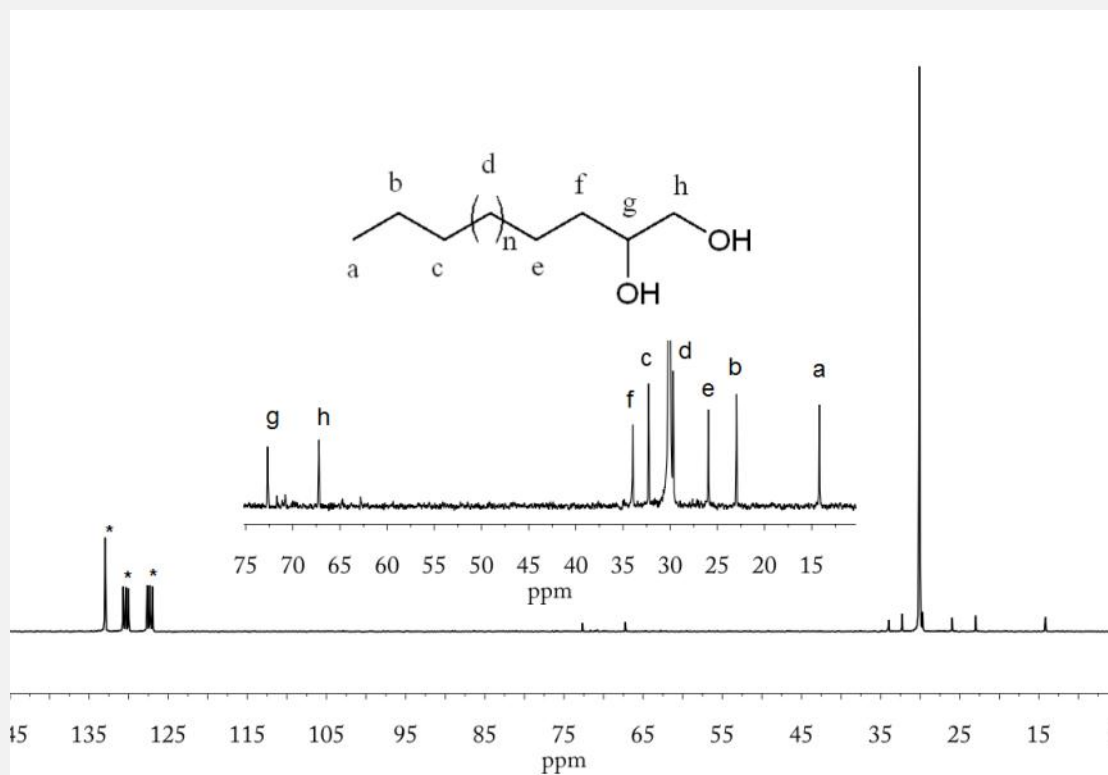

Figure S12 <sup>13</sup>C NMR spectrum of diol-PE (1,2-Dichlorobenzene-d<sub>4</sub>)

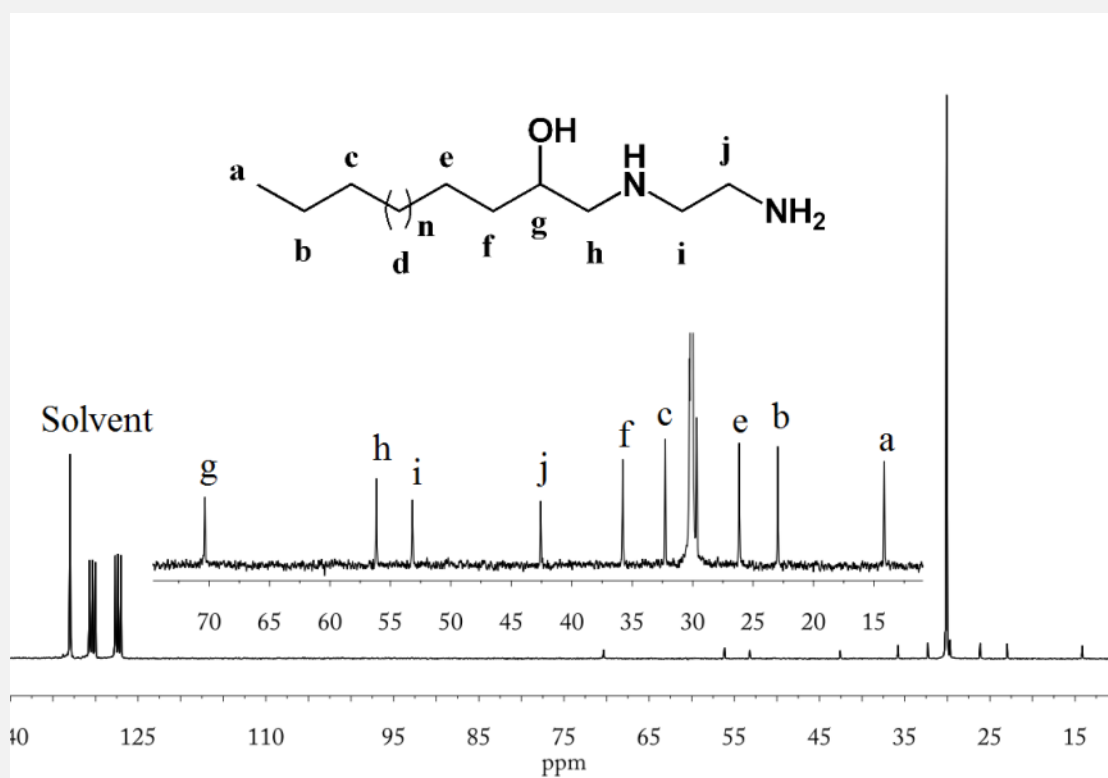

Figure S13 <sup>13</sup>C NMR spectrum of NH<sub>2</sub>-t-PE (1,2-Dichlorobenzene-d<sub>4</sub>)

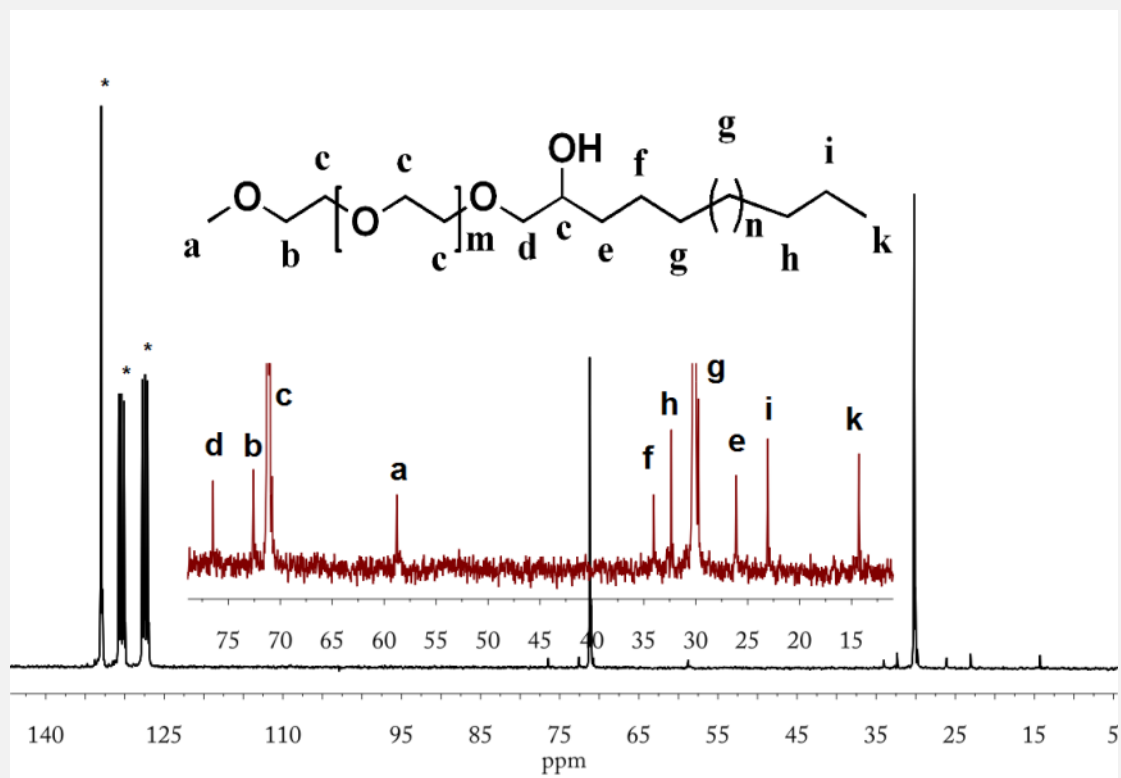

Figure S14  $^{13}\text{C}$  NMR spectrum of PE-*b*-PEG (1,2-Dichlorobenzene- $\text{d}_4$ )

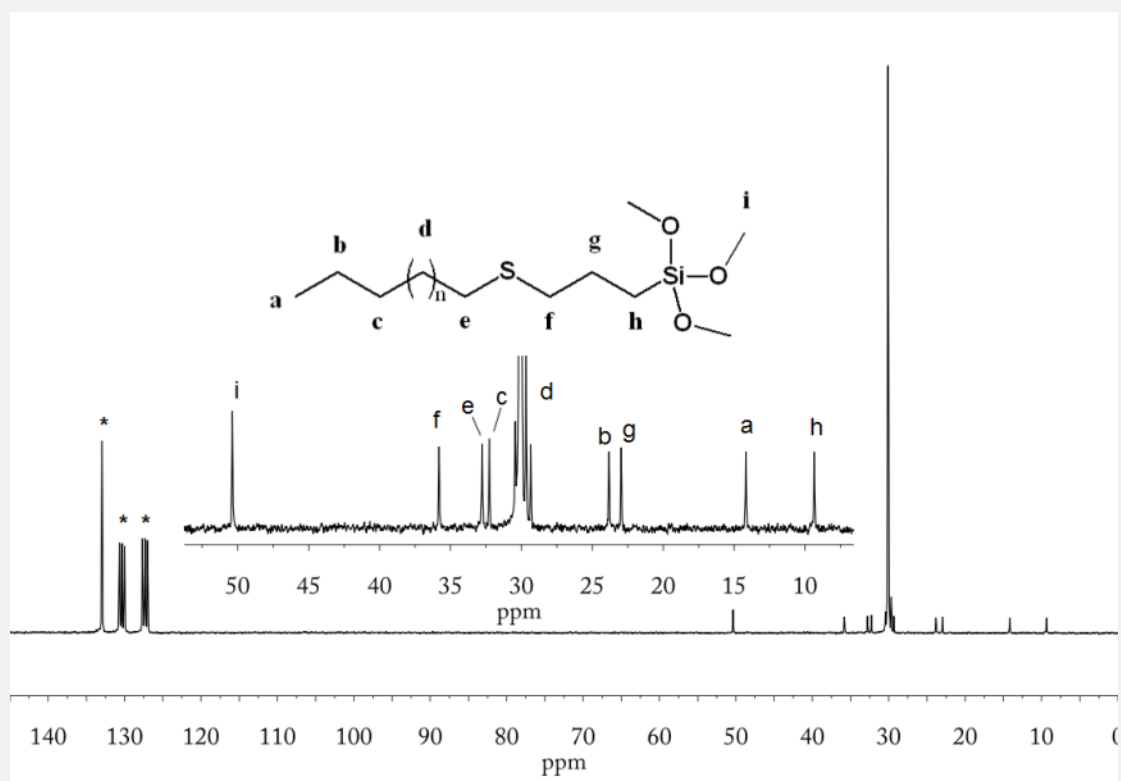

Figure S15  $^{13}\text{C}$  NMR spectrum of TMS-*t*-PE (1,2-Dichlorobenzene- $\text{d}_4$ )



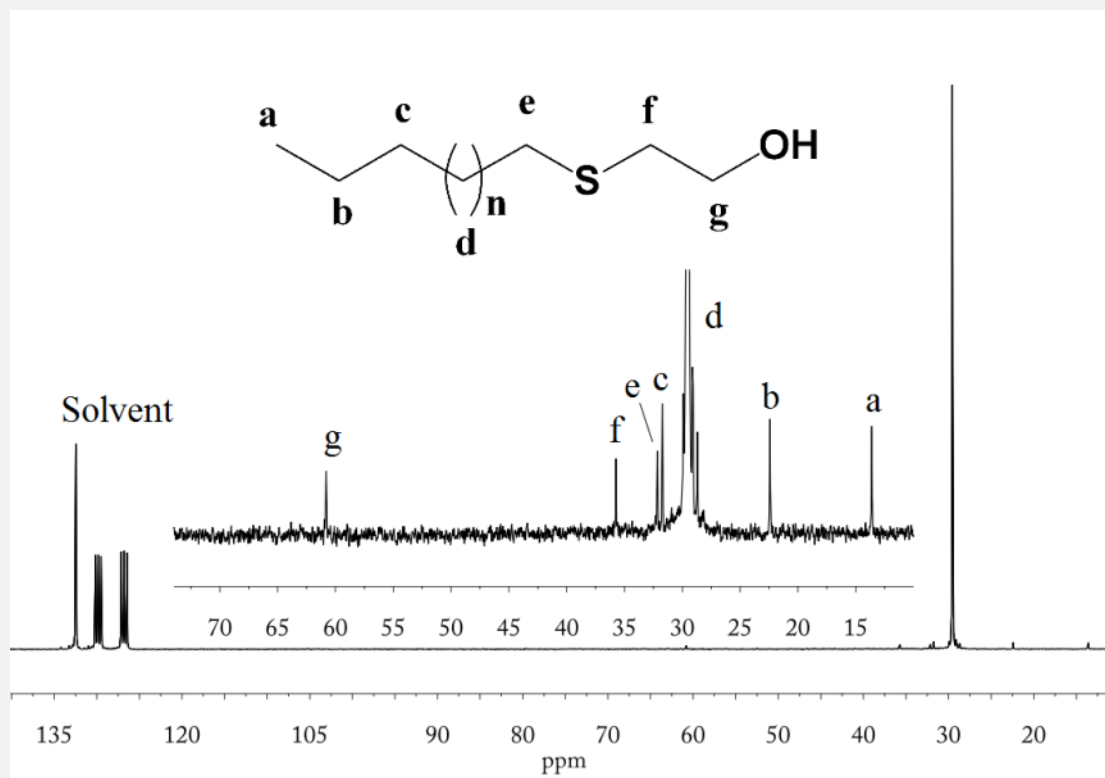

Figure S16 <sup>13</sup>C NMR spectrum of PE-S-OH (1,2-Dichlorobenzene-d<sub>4</sub>)

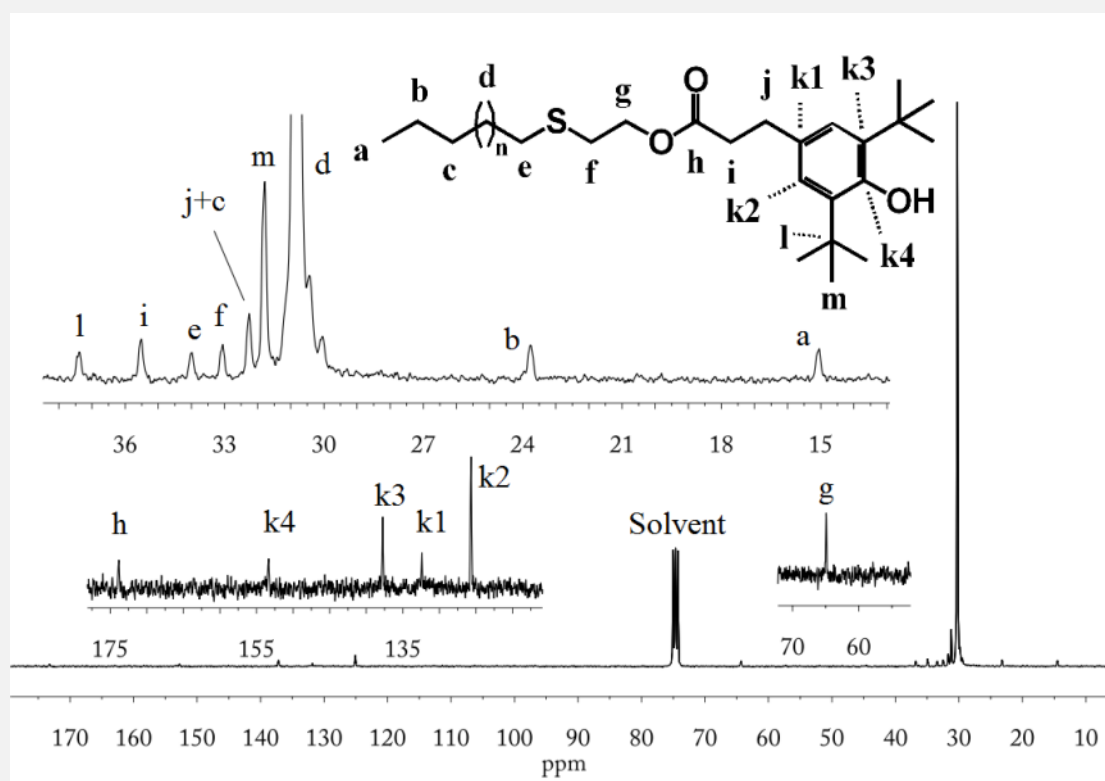

Figure S17 <sup>13</sup>C NMR spectrum of AO-t-PE (1,1,2,2-Tetrachloroethane-D<sub>2</sub>)

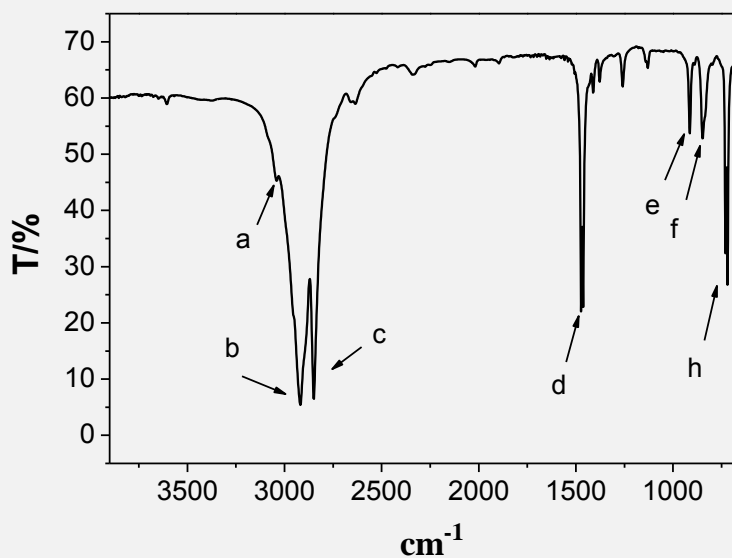

**Figure S18 FT-IR spectrum of e-PE**

Peaks: a ( $3040\text{ cm}^{-1}$ ) C-H (in epoxy group) stretching, b ( $2918\text{ cm}^{-1}$ ) and c ( $2849\text{ cm}^{-1}$ ) C-H stretching, d ( $1470\text{ cm}^{-1}$ ) C-H bending ( $\text{CH}_2$ ), e ( $914\text{ cm}^{-1}$ ) and f ( $848\text{ cm}^{-1}$ ) C-O-C (in epoxy group) stretching, h ( $719\text{ cm}^{-1}$ ) C-C out of plane bending

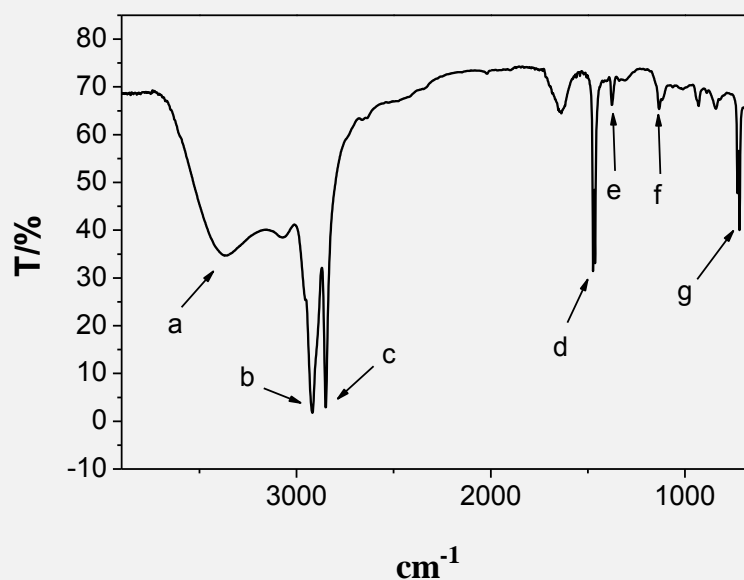

**Figure S19 FT-IR spectrum of 2-hydroxy PE**

Peaks: a ( $3363\text{ cm}^{-1}$ ) O-H stretching, b ( $2918\text{ cm}^{-1}$ ) and c ( $2849\text{ cm}^{-1}$ ) C-H stretching, d ( $1473\text{ cm}^{-1}$ ) C-H bending ( $\text{CH}_2$ ), e ( $1376\text{ cm}^{-1}$ ) C-H bending ( $\text{CH}_3$ ), f ( $1133\text{ cm}^{-1}$ ) C-O

stretching, g ( $719\text{cm}^{-1}$ ) C-C out of plane bending

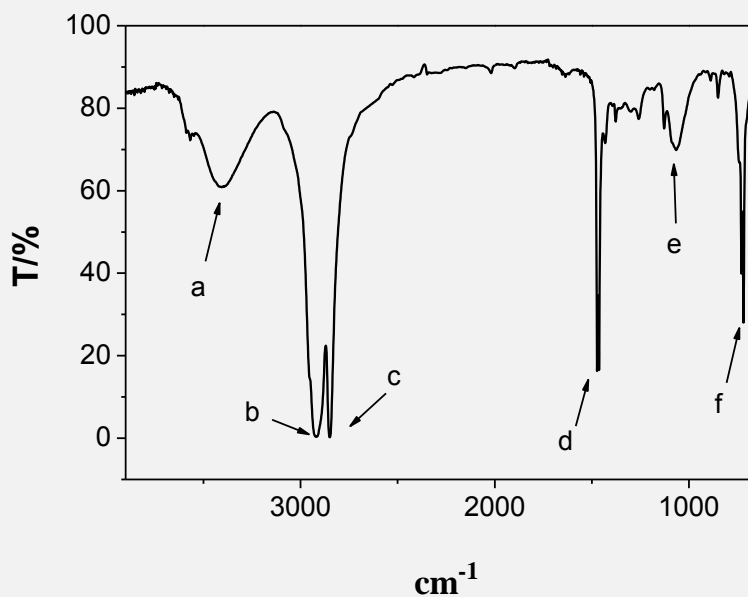

**Figure S20 FT-IR spectrum of chloro-t-PE**

Peaks: a ( $3405\text{ cm}^{-1}$ ) O-H stretching, b ( $2918\text{ cm}^{-1}$ ) and c ( $2849\text{ cm}^{-1}$ ) C-H stretching, d ( $1473\text{ cm}^{-1}$ ) C-H bending ( $\text{CH}_2$ ), e ( $1066\text{ cm}^{-1}$ ) C-O stretching, f ( $719\text{ cm}^{-1}$ ) C-C out of plane bending

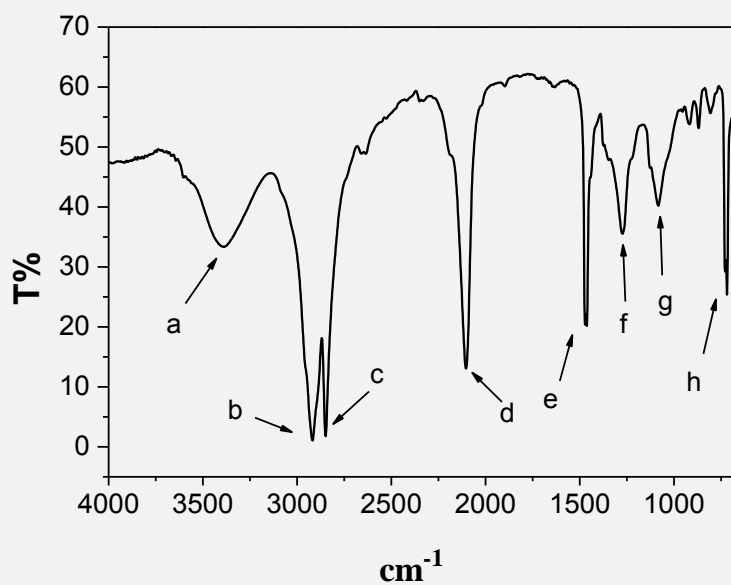

**Figure S21 FT-IR spectrum of azide-t-PE**

Peaks: a ( $3388\text{ cm}^{-1}$ ) O-H stretching, b ( $2918\text{ cm}^{-1}$ ) and c ( $2848\text{ cm}^{-1}$ ) C-H stretching, d ( $2104\text{ cm}^{-1}$ ) N=N=N stretching, e ( $1462\text{ cm}^{-1}$ ) C-H bending ( $\text{CH}_2$ ), f ( $1274\text{ cm}^{-1}$ ), g ( $1084\text{ cm}^{-1}$ ) C-O and C-N stretching, h ( $719\text{ cm}^{-1}$ ) C-C out of plane bending

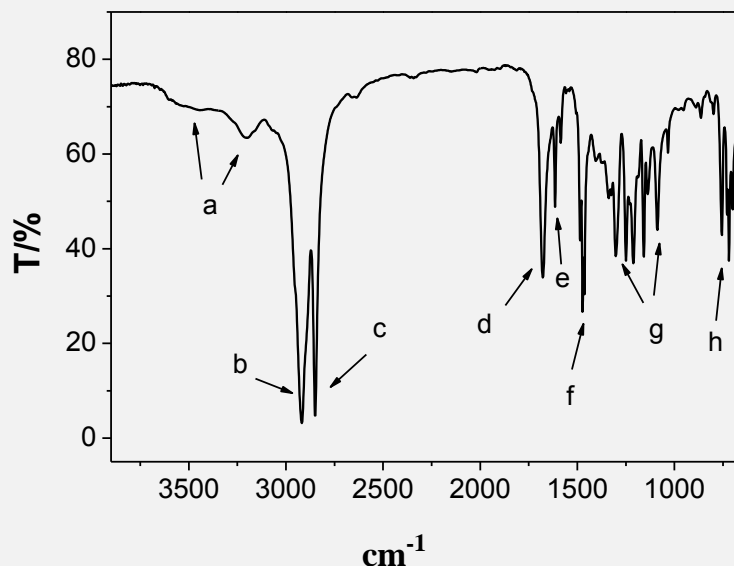

**Figure 22 FT-IR spectrum of carboxy-t-PE**

Peaks: a ( $3500\text{-}3100\text{ cm}^{-1}$ ) Hydroxyl (left, broad) and carboxyl (right, sharp) O-H stretching, b ( $2918\text{ cm}^{-1}$ ) and c ( $2849\text{ cm}^{-1}$ ) C-H stretching, d ( $1678\text{ cm}^{-1}$ ) C=O stretching, e ( $1614\text{ cm}^{-1}$ ) C=C (Aromatic) stretching, f ( $1490\text{-}1450\text{ cm}^{-1}$ ) C-H bending & C=C (Aromatic) stretching ( $\text{CH}_2$ ), g ( $1300\text{-}1100\text{ cm}^{-1}$ ) C-O stretching, h ( $750\text{-}710\text{ cm}^{-1}$ ) C-C out of plane bending & C-H (Aromatic) out of plane bending

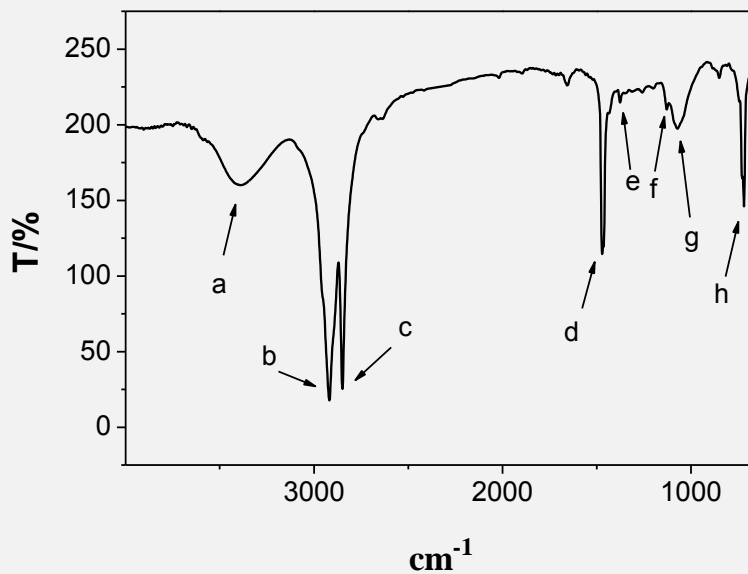

**Figure S23 FT-IR spectrum of sulfo-t-PE**

Peaks: a ( $3387\text{ cm}^{-1}$ ) O-H stretching, b ( $2918\text{ cm}^{-1}$ ) and c ( $2849\text{ cm}^{-1}$ ) C-H stretching, d ( $1473\text{ cm}^{-1}$ ) C-H bending ( $\text{CH}_2$ ), e ( $1377\text{ cm}^{-1}$ ) O=S=O asymmetrical stretching, f ( $1158\text{ cm}^{-1}$ ) O=S=O symmetrical stretching, g ( $1072\text{ cm}^{-1}$ ) C-O stretching, h ( $719\text{ cm}^{-1}$ ) C-C out of plane bending

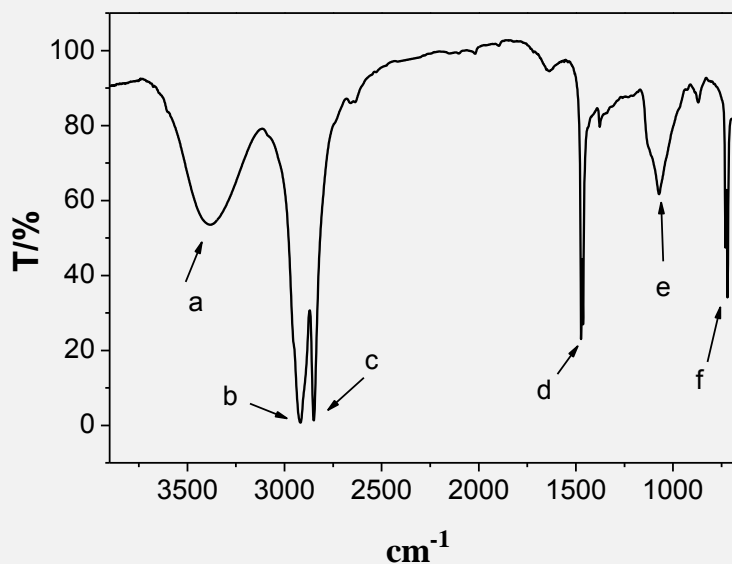

**Figure S24 FT-IR spectrum of diol-PE**

Peaks: a ( $3383\text{ cm}^{-1}$ ) O-H stretching, b ( $2918\text{ cm}^{-1}$ ) and c ( $2849\text{ cm}^{-1}$ ) C-H stretching, d

(1473  $\text{cm}^{-1}$ ) C-H bending ( $\text{CH}_2$ ), e (1072  $\text{cm}^{-1}$ ) C-O stretching, f (719 $\text{cm}^{-1}$ ) C-C out of plane bending

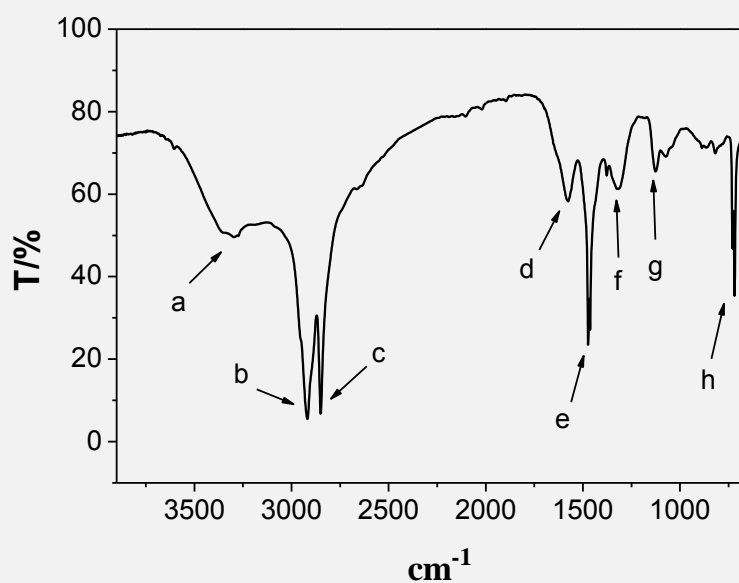

**Figure S25 FT-IR spectrum of NH<sub>2</sub>-t-PE**

Peaks: a (3295  $\text{cm}^{-1}$ , broad) O-H & N-H stretching, b (2918  $\text{cm}^{-1}$ ) and c (2849  $\text{cm}^{-1}$ ) C-H stretching, d (1576  $\text{cm}^{-1}$ ) N-H bending, e (1473  $\text{cm}^{-1}$ ) C-H bending ( $\text{CH}_2$ ), f (1319  $\text{cm}^{-1}$ ) C-N stretching, g (1126  $\text{cm}^{-1}$ ) C-O stretching, h (719 $\text{cm}^{-1}$ ) C-C out of plane bending

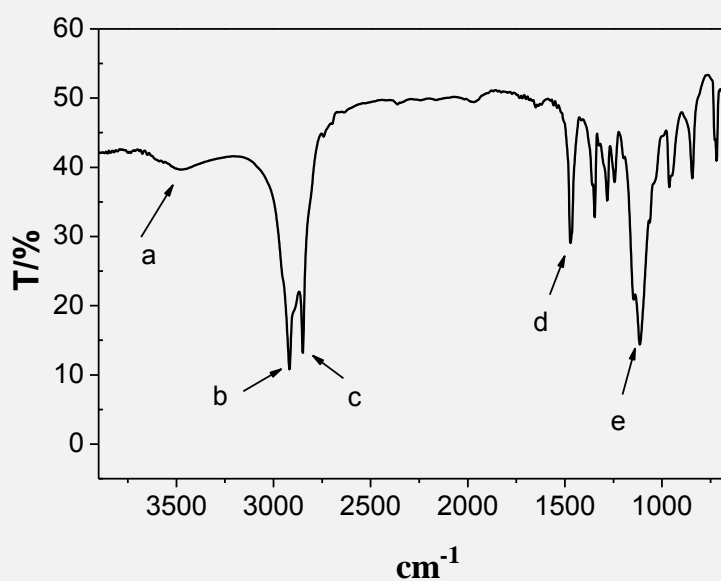

**Figure S26 FT-IR spectrum of PE-*b*-PEG**

Peaks: a ( $3480\text{ cm}^{-1}$ ) O-H stretching, b ( $2917\text{ cm}^{-1}$ ) and c ( $2848\text{ cm}^{-1}$ ) C-H stretching, d ( $1470\text{ cm}^{-1}$ ) C-H bending ( $\text{CH}_2$ ), e ( $1114\text{ cm}^{-1}$ ) C-O-C stretching

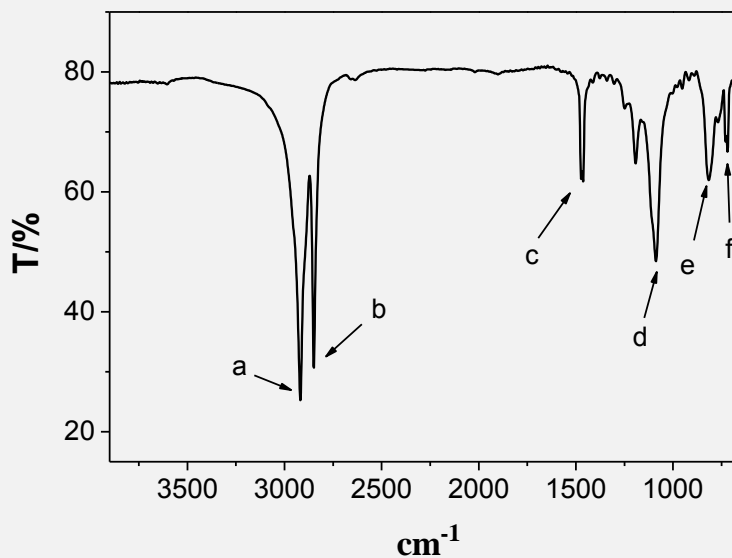

**Figure S27 FT-IR spectrum of TMS-*t*-PE**

Peaks: a ( $2918\text{ cm}^{-1}$ ) and b ( $2849\text{ cm}^{-1}$ ) C-H stretching, c ( $1470\text{ cm}^{-1}$ ) C-H bending ( $\text{CH}_2$ ), d ( $1088\text{ cm}^{-1}$ ) C-O stretching, e ( $816\text{ cm}^{-1}$ ) Si-O symmetric stretching vibration in Si-O-C structure (?), f ( $719\text{ cm}^{-1}$ ) C-C out of plane bending

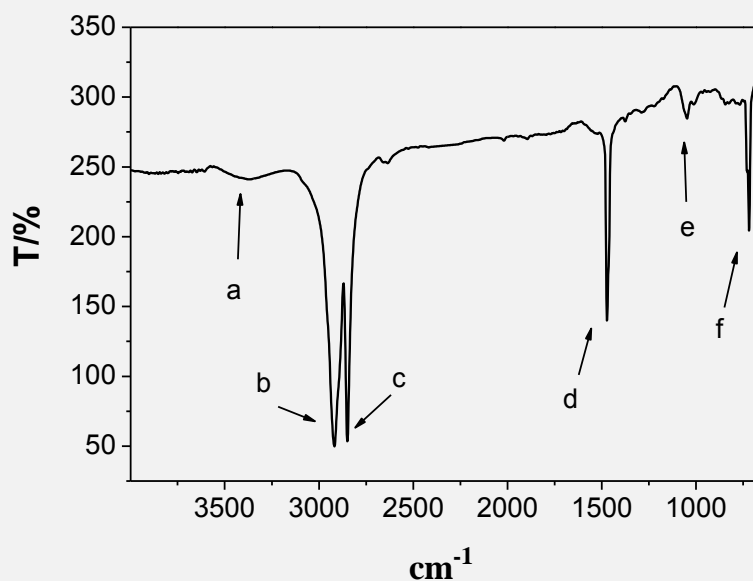

**Figure S28 FT-IR spectrum of PE-S-OH**

Peaks: a ( $3373\text{ cm}^{-1}$ ) O-H stretching, b ( $2918\text{ cm}^{-1}$ ) and c ( $2849\text{ cm}^{-1}$ ) C-H stretching, d ( $1472\text{ cm}^{-1}$ ) C-H bending ( $\text{CH}_2$ ), e ( $1048\text{ cm}^{-1}$ ) C-O stretching, f ( $719\text{ cm}^{-1}$ ) C-C out of plane bending

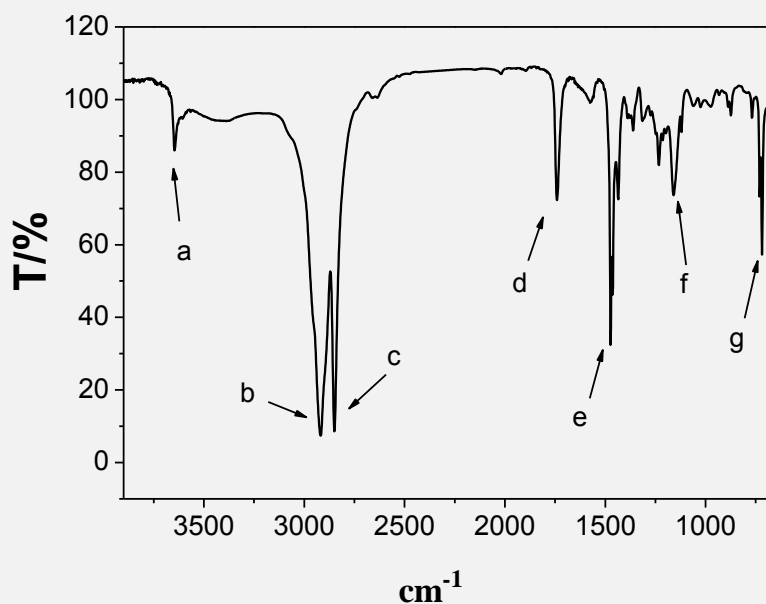

**Figure S29 FT-IR spectrum of AO-t-PE**

Peaks: a ( $3647\text{ cm}^{-1}$ ) phenolic hydroxyl O-H stretching, b ( $2918\text{ cm}^{-1}$ ) and c ( $2849\text{ cm}^{-1}$ )



C-H stretching, d ( $1740\text{ cm}^{-1}$ ) C=O (ester) stretching, e ( $1473\text{ cm}^{-1}$ ) C-H bending  
( $\text{CH}_2$ ), f ( $1159\text{ cm}^{-1}$ ) C-O stretching, i ( $719\text{ cm}^{-1}$ ) C-C out of plane bending

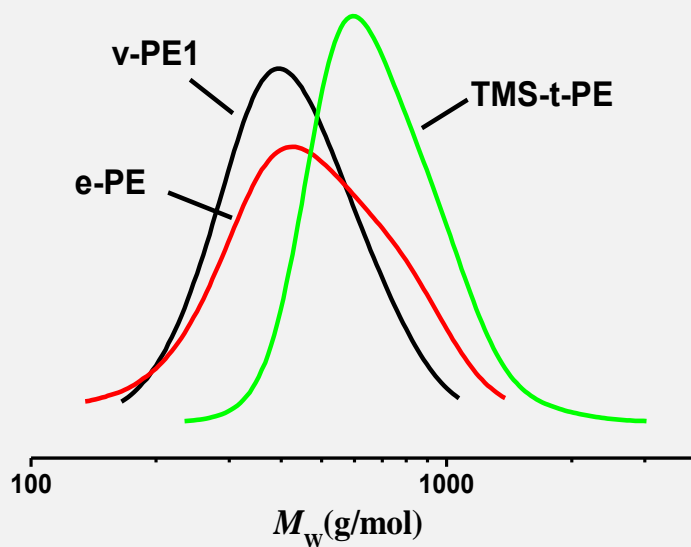

Figure S30 GPC curves of v-PE1, e-PE and TMS-t-PE

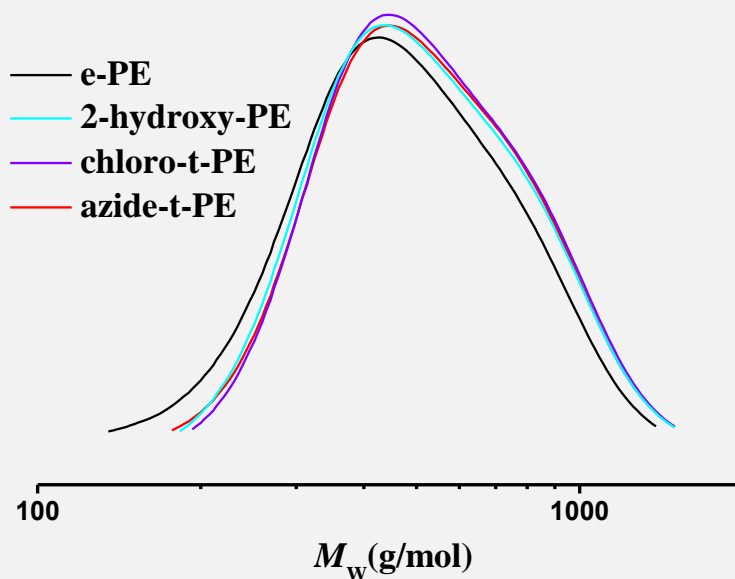

Figure S31 GPC curves of e-PE, 2-hydroxy-PE, chloro-t-PE and azide-t-PE

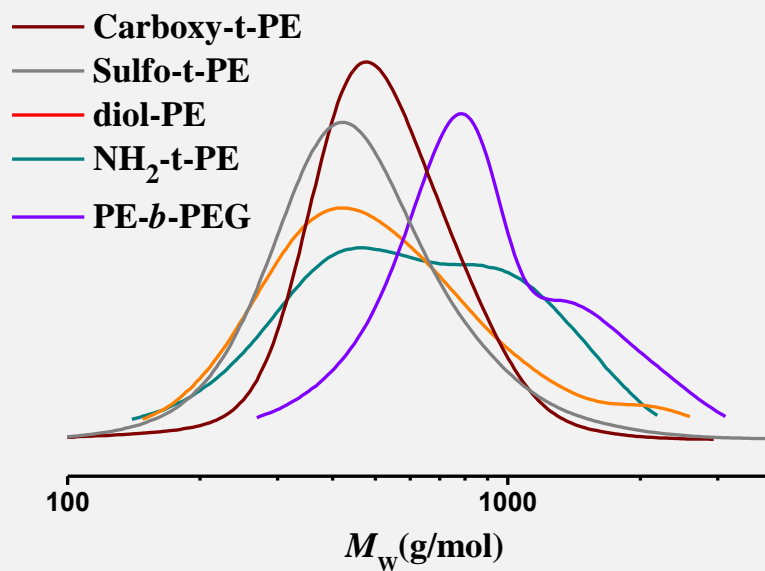

Figure S32 GPC curves of carboxy-t-PE, sulfo-t-PE, diol-PE,  $\text{NH}_2$ -t-PE and PE-*b*-PEG

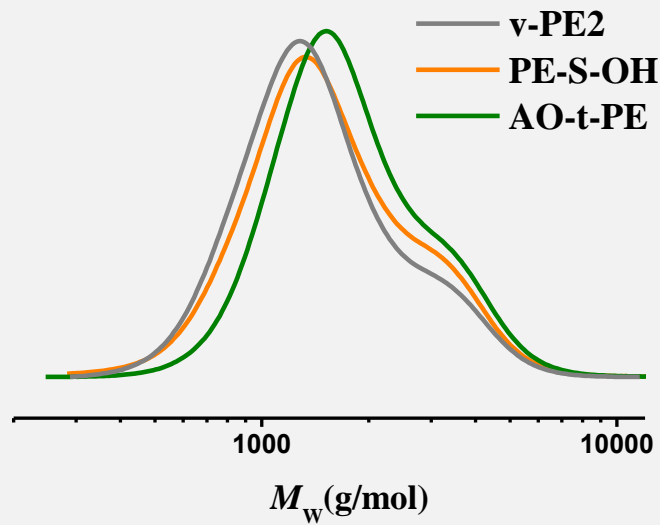

Figure S33 GPC curves of v-PE2, PE-t-OH, and AO-t-PE

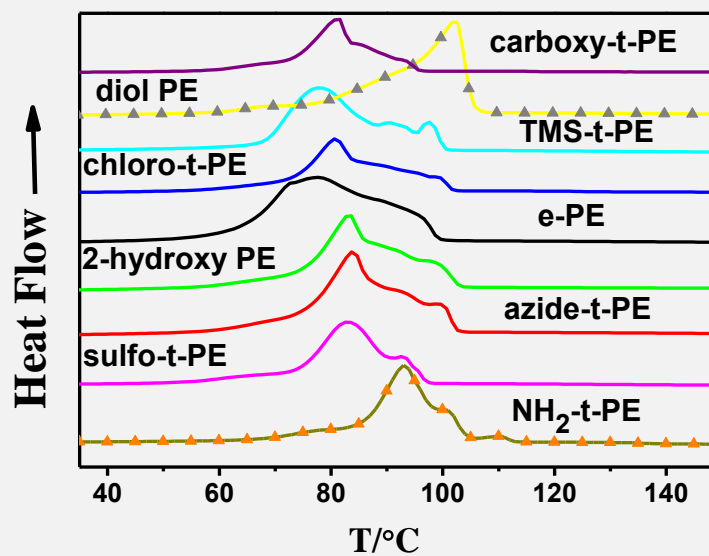

Figure S34 DSC heating curves of Cef-PEs (all derived from v-PE1)

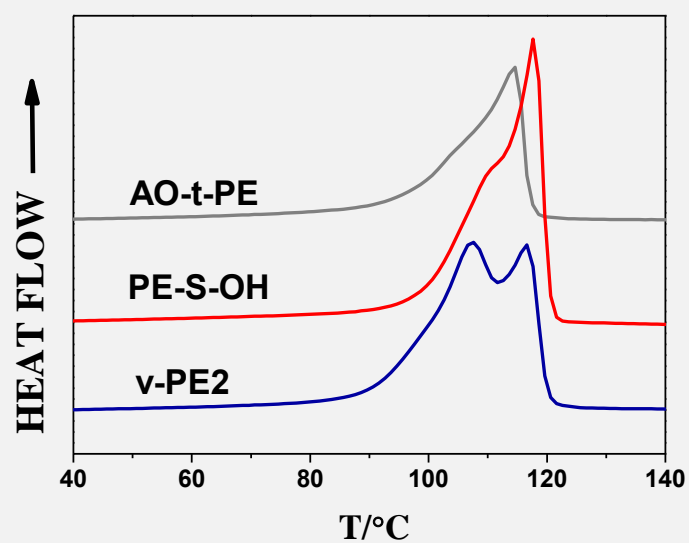

Figure S35 DSC heating curves of v-PE2, PE-S-OH, AO-t-PE
